# Supplementary material for: Osteocyte TGFβ1-Smad2/3 is positively associated with bone turnover parameters in subchondral bone of advanced osteoarthritis
Source: PubMed Central journal article supplement — Int J Mol Med. 2020 Apr 14;46(1):167–78. doi: 10.3892/ijmm.2020.4576 (PMC7255453; doi:10.3892/ijmm.2020.4576), 2020-04-14

Figure S1. Expression of TGF $\beta$ 1 in subchondral bone from three groups. The expression of TGF $\beta$ 1 was assessed by immunofluorescence staining with a TGF $\beta$ 1 antibody. In the full cartilage group, (a) there was almost no activated TGF $\beta$ 1 (red) expression in the extracellular matrix and (b) it was counterstained with DAPI and (c) merged. (d) A small amount of activated TGF $\beta$ 1 (red) was expressed in the partial cartilage group and (e) it was counterstained with DAPI and (f) merged. (g) A large amount of activated TGF $\beta$ 1 (red) was expressed in the full defect group and (h) it was counterstained with DAPI and (i) merged. In the partial cartilage group, the yellow dotted line represents the boundary between cartilage and subchondral bone. Scale bars, 250  $\mu$ m. DAPI, 4',6-diamidino-2-phenylindole; Merge, merging of TGF $\beta$ 1 and DAPI in an image; TGF $\beta$ , transforming growth factor  $\beta$ .

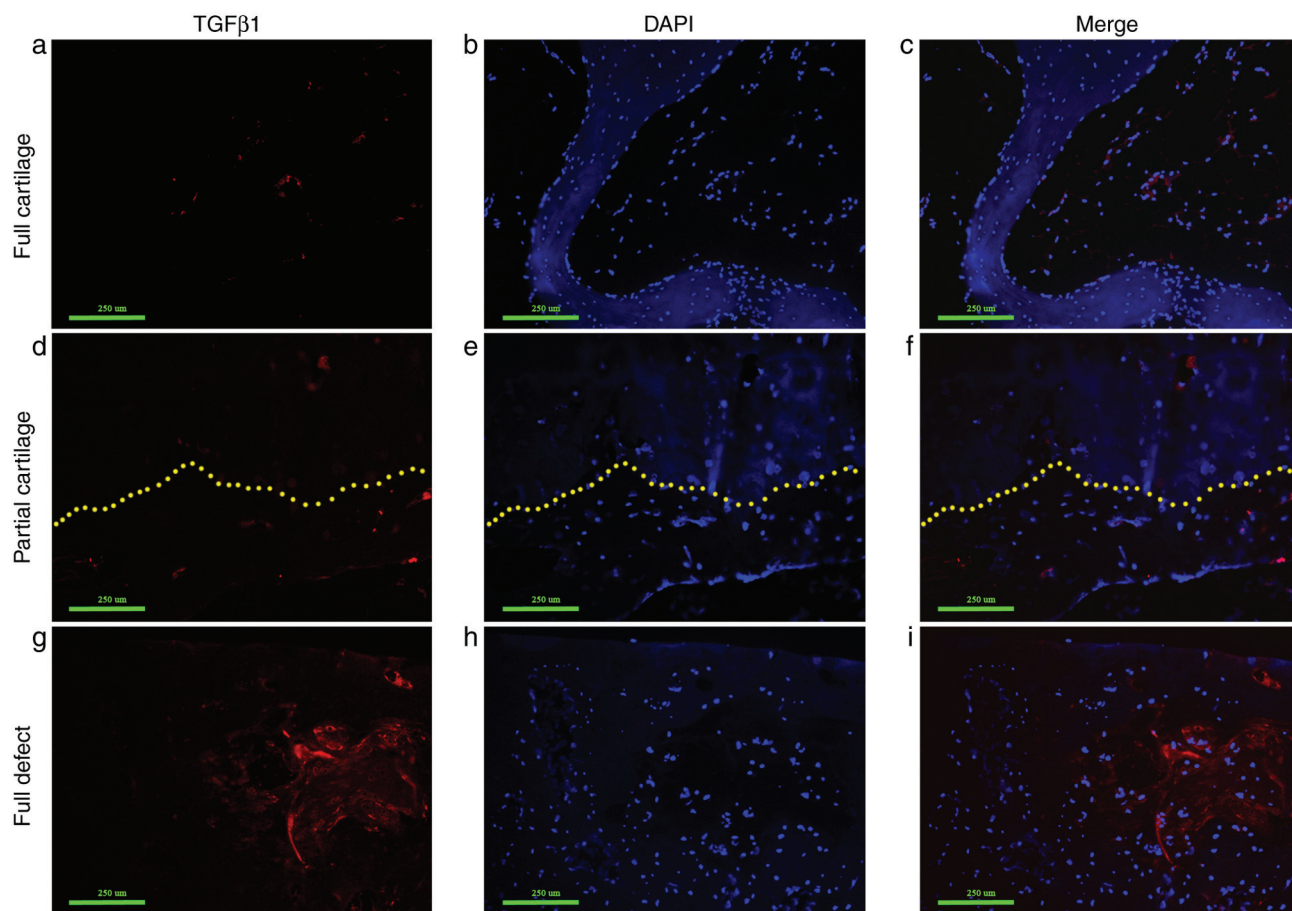

Figure S2. Activation of TGF $\beta$  signaling of chondrocytes in the full and partial cartilage groups. The activation of TGF $\beta$  signaling was detected by (A) immunohistochemical staining with a p-Smad2/3 antibody to test TGF $\beta$  signaling (B) and immunofluorescence staining for Adamts4 (red). The positive cells that stained brown in the full cartilage group were only located in (a) the HZ of cartilage, while in the partial cartilage group they were located in (d) the IZ and HZ. (b) and (e) are magnification of the super layer in (a) and (d) respectively, while (c) and (f) are magnification of the deep layer in (a) and (d) respectively. Scale bar in Ab and c and Ae and f, 100  $\mu$ m; in Aa and d, 1,000  $\mu$ m; in B, 250  $\mu$ m. DAPI, 4',6-diamidino-2-phenylindole; SZ, superficial zone; IZ, intermediate zone; HZ, hypertrophic zone; TGF $\beta$ , transforming growth factor  $\beta$ ; p, phosphorylated; Adamts4, a disintegrin and metalloproteinase with thrombospondin motifs.

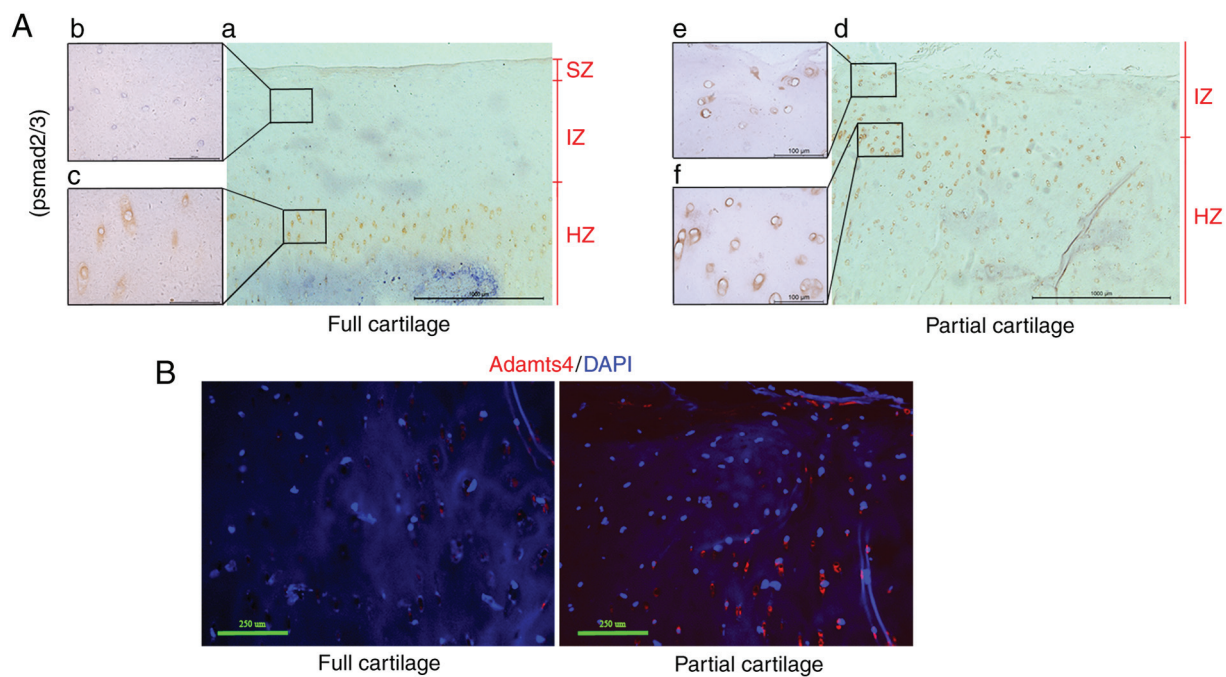

Supplement: Supplementary_Data.pdf [file Supplementary_Data.pdf]
